# Supplementary material for: Reaction progress of clay minerals and carbonaceous matter in a contact metamorphic aureole (Torres del Paine intrusion, Chile)
Source: Copernicus journal article supplement (doi:10.5194/ejm-32-653-2020), 2020-12-09
Supplement: Supplementary file 1 [file ejm-32-653-2020-supplement.zip]

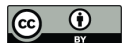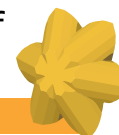

## *Supplement of*

# **Reaction progress of clay minerals and carbonaceous matter in a contact metamorphic aureole (Torres del Paine intrusion, Chile)**

**Annette Süssenberger et al.**

*Correspondence to:* Annette Süssenberger ([annette.suessenberger@unige.ch](mailto:annette.suessenberger@unige.ch))

- [ejm-32-653-2020-supplement-title-page.pdf](#)
- [Suppl 1.pdf](#)
- [Suppl 2.xlsx](#)

The copyright of individual parts of the supplement might differ from the CC BY 4.0 License.
