# Supplementary material for: Reaction progress of clay minerals and carbonaceous matter in a contact metamorphic aureole (Torres del Paine intrusion, Chile)
Source: Copernicus journal article supplement (doi:10.5194/ejm-32-653-2020), 2020-12-09
Supplement: Supplementary file 1 [file Suppl 2.xlsx]

## Sheet: Summary
Article title: Reaction progress of clay minerals and carbonaceous matter in a contact metamorphic aureole (Torres del Paine Intrusion, Chile)
Journal name: European Journal of Mineralogy
Authors: Annette Süssenberger, Susanne Th. Schmidt, Florian H. Schmidt, Manuel F. G. Weinkauf
Corresponding author: Annette Süssenberger, Department of Earth Sciences, University of Geneva, Rue des Maraîchers 13, 1205 Geneva, Switzerland; asuesse1@gmail.com
Summary of the framework parameters for the intrusion models.
Parameter	Min. value	Max. value	Variation steps
Intrusion temperature [°C]	800	1000	200
Heating duration [yrs]	3000	7000	2000
No. of pulses [#]	1	13	4
Repose time [yrs]	5000	15000	5000

## Sheet: Full-factorial design
Article title: Reaction progress of clay minerals and carbonaceous matter in a contact metamorphic aureole (Torres del Paine Intrusion, Chile)
Journal name: European Journal of Mineralogy
Authors: Annette Süssenberger, Susanne Th. Schmidt, Florian H. Schmidt, Manuel F. G. Weinkauf
Corresponding author: Annette Süssenberger, Department of Earth Sciences, University of Geneva, Rue des Maraîchers 13, 1205 Geneva, Switzerland; asuesse1@gmail.com
Full-factorial design of the intrusion models, separated into 1-batch, 2-batch- and 3-batch setups, alongside yielded model temperatures at comparison points for the field Raman measurements.
							Temperature [°C] at distance to intrusion [m]
Exp. #	Intrusion temperature [°C]	Heating duration [yrs]	No. of pulses [#]	Repose time [yrs]	Batch repose time [yrs]	Total duration of the model [kyrs]	240	600	900	1100	1200	1500	2000	2000	2500	3000
1-batch setup
1B1	800	3000	1	5000		3	288.354	187.57	158.623	146.758	142.375	131.871	136.986	136.986	141.457	143.172
1B2	800	3000	1	10000		3	288.354	187.57	158.623	146.758	142.375	131.871	136.986	136.986	141.457	143.172
1B3	800	3000	1	15000		3	288.354	187.57	158.623	146.758	142.375	131.871	136.986	136.986	141.457	143.172
1B4	800	3000	5	5000		35	456.546	294.25	227.897	199.676	188.445	162.576	136.986	136.986	141.457	143.172
1B5	800	3000	5	10000		55	439.499	293.13	231.249	203.644	192.302	166.242	136.986	136.986	141.457	143.172
1B6	800	3000	5	15000		75	420.159	284.681	228.121	202.336	191.479	166.51	136.986	136.986	141.457	143.172
1B7	800	3000	9	5000		67	493.981	338.067	264.726	230.989	216.893	184.471	145.014	145.014	141.457	143.172
1B8	800	3000	9	10000		107	468.206	327.766	263.174	232.419	219.016	188.026	149.403	149.403	141.457	143.172
1B9	800	3000	9	15000		147	442.233	311.472	253.751	226.144	213.879	185.482	149.278	149.278	141.457	143.172
1B10	800	3000	13	5000		99	510.174	360.103	286.095	250.635	235.243	199.645	155.729	155.729	141.457	143.172
1B11	800	3000	13	10000		159	478.841	342.37	278.094	246.784	232.723	200.059	158.1	158.1	141.457	143.172
1B12	800	3000	13	15000		219	449.194	320.73	263.288	235.461	222.832	193.553	155.186	155.186	141.457	143.172
1B13	800	5000	1	5000		5	336.182	205.355	169.079	154.406	148.869	135.577	136.986	136.986	141.457	143.172
1B14	800	5000	1	10000		5	336.182	205.355	169.079	154.406	148.869	135.577	136.986	136.986	141.457	143.172
1B15	800	5000	1	15000		5	336.182	205.355	169.079	154.406	148.869	135.577	136.986	136.986	141.457	143.172
1B16	800	5000	5	5000		45	497.073	324.433	249.951	217.478	204.361	174.336	137.781	137.781	141.457	143.172
1B17	800	5000	5	10000		65	481.766	321.613	252.307	220.949	207.893	177.923	141.157	141.157	141.457	143.172
1B18	800	5000	5	15000		85	465.409	312.97	248.808	219.426	206.922	178.191	142.531	142.531	141.457	143.172
1B19	800	5000	9	5000		85	527.793	365.196	287.213	250.475	234.758	198.507	154.234	154.234	141.457	143.172
1B20	800	5000	9	10000		125	505.677	353.715	283.505	249.867	235.038	200.687	157.483	157.483	141.457	143.172
1B21	800	5000	9	15000		165	483.689	337.843	273.576	242.89	229.172	197.44	156.68	156.68	141.457	143.172
1B22	800	5000	13	5000		125	539.776	383.616	306.33	268.758	252.111	213.479	164.896	164.896	141.457	143.172
1B23	800	5000	13	10000		185	513.76	365.768	296.322	262.489	247.186	211.64	165.406	165.406	141.457	143.172
1B24	800	5000	13	15000		245	488.88	345.409	281.59	250.828	236.85	204.48	161.892	161.892	141.457	143.172
1B25	800	7000	1	5000		7	371.82	220.25	177.883	160.919	154.468	139.032	136.986	136.986	141.457	143.172
1B26	800	7000	1	10000		7	371.82	220.25	177.883	160.919	154.468	139.032	136.986	136.986	141.457	143.172
1B27	800	7000	1	15000		7	371.82	220.25	177.883	160.919	154.468	139.032	136.986	136.986	141.457	143.172
1B28	800	7000	5	5000		55	520.534	345.77	266.778	231.498	217.024	183.877	143.742	143.742	141.457	143.172
1B29	800	7000	5	10000		75	508.479	341.783	267.894	234.069	219.829	187.081	146.993	146.993	141.457	143.172
1B30	800	7000	5	15000		95	494.454	333.041	263.967	232.139	218.497	187.107	148.175	148.175	141.457	143.172
1B31	800	7000	9	5000		103	545.721	382.675	302.596	264.274	247.59	208.987	161.313	161.313	141.457	143.172
1B32	800	7000	9	10000		143	528.227	370.801	297.226	261.867	246.132	209.664	163.288	163.288	141.457	143.172
1B33	800	7000	9	15000		183	509.953	355.588	287.01	254.316	239.643	205.723	161.856	161.856	141.457	143.172
1B34	800	7000	13	5000		151	554.937	397.747	319.031	280.418	263.098	222.795	171.144	171.144	141.457	143.172
1B35	800	7000	13	10000		211	534.381	380.565	307.915	272.531	256.47	219.164	170.258	170.258	141.457	143.172
1B36	800	7000	13	15000		271	513.916	361.65	293.569	260.868	246.001	211.626	166.306	166.306	141.457	143.172
1B37	1000	3000	1	5000		3	337.42	207.29	170.526	155.571	149.91	136.265	136.986	136.986	141.457	143.172
1B38	1000	3000	1	10000		3	337.42	207.29	170.526	155.571	149.91	136.265	136.986	136.986	141.457	143.172
1B39	1000	3000	1	15000		3	337.42	207.29	170.526	155.571	149.91	136.265	136.986	136.986	141.457	143.172
1B40	1000	3000	5	5000		35	556.524	347.466	262.48	226.503	212.18	179.19	138.753	138.753	141.457	143.172
1B41	1000	3000	5	10000		55	535.645	347.34	267.9	232.538	218.002	184.691	143.349	143.349	141.457	143.172
1B42	1000	3000	5	15000		75	511.341	337.158	264.475	231.375	217.42	185.408	145.391	145.391	141.457	143.172
1B43	1000	3000	9	5000		67	606.137	405.559	311.283	267.997	249.889	208.354	157.636	157.636	141.457	143.172
1B44	1000	3000	9	10000		107	573.451	392.92	309.877	270.341	253.101	213.266	163.589	163.589	141.457	143.172
1B45	1000	3000	9	15000		147	540.125	372.044	297.837	262.339	246.561	210.039	163.458	163.458	141.457	143.172
1B46	1000	3000	13	5000		99	627.359	434.429	339.279	293.699	273.906	228.165	171.698	171.698	141.457	143.172
1B47	1000	3000	13	10000		159	587.174	411.752	329.12	288.863	270.779	228.771	174.793	174.793	142.493	143.172
1B48	1000	3000	13	15000		219	549.022	383.875	310.024	274.245	258.007	220.356	171.007	171.007	141.457	143.172
1B49	1000	5000	1	5000		5	399.239	230.266	184.233	165.772	158.728	141.618	136.986	136.986	141.457	143.172
1B50	1000	5000	1	10000		5	399.239	230.266	184.233	165.772	158.728	141.618	136.986	136.986	141.457	143.172
1B51	1000	5000	1	15000		5	399.239	230.266	184.233	165.772	158.728	141.618	136.986	136.986	141.457	143.172
1B52	1000	5000	5	5000		45	609.321	387.002	291.425	249.885	233.096	194.798	147.779	147.779	141.457	143.172
1B53	1000	5000	5	10000		65	590.349	384.355	295.294	255.058	238.31	199.919	152.638	152.638	141.457	143.172
1B54	1000	5000	5	15000		85	569.691	373.69	291.224	253.478	237.407	200.512	154.645	154.645	141.457	143.172
1B55	1000	5000	9	5000		85	649.903	440.827	340.57	293.36	273.151	226.603	169.7	169.7	141.457	143.172
1B56	1000	5000	9	10000		125	621.663	426.331	336.071	292.821	273.748	229.579	174.005	174.005	141.457	143.172
1B57	1000	5000	9	15000		165	593.404	405.928	323.307	283.853	266.208	225.4	172.964	172.964	141.469	143.172
1B58	1000	5000	13	5000		125	665.492	464.763	365.408	317.102	295.692	246.02	183.535	183.535	146.62	143.172
1B59	1000	5000	13	10000		185	632.043	441.804	352.525	309.026	289.346	243.637	184.169	184.169	148.433	143.172
1B60	1000	5000	13	15000		245	600.025	415.579	333.53	293.979	276.005	234.383	179.615	179.615	146.264	143.172
1B61	1000	7000	1	5000		7	445.287	249.583	195.763	174.427	166.243	146.346	136.986	136.986	141.457	143.172
1B62	1000	7000	1	10000		7	445.287	249.583	195.763	174.427	166.243	146.346	136.986	136.986	141.457	143.172
1B63	1000	7000	1	15000		7	445.287	249.583	195.763	174.427	166.243	146.346	136.986	136.986	141.457	143.172
1B64	1000	7000	5	5000		55	639.961	414.988	313.52	268.283	249.726	207.343	155.759	155.759	141.457	143.172
1B65	1000	7000	5	10000		75	624.93	410.55	315.581	272.146	253.84	211.825	160.292	160.292	141.457	143.172
1B66	1000	7000	5	15000		95	607.123	399.61	310.821	269.92	252.374	212.039	161.968	161.968	141.457	143.172
1B67	1000	7000	9	5000		103	673.08	463.472	360.521	311.26	289.804	240.189	178.894	178.894	142.948	143.172
1B68	1000	7000	9	10000		143	650.657	448.305	353.721	308.259	288.022	241.125	181.469	181.469	145.954	143.172
1B69	1000	7000	9	15000		183	627.152	428.72	340.557	298.521	279.652	236.031	179.606	179.606	145.662	143.172
1B70	1000	7000	13	5000		151	684.987	482.937	381.746	332.101	309.828	258.002	191.565	191.565	152.158	143.172
1B71	1000	7000	13	10000		211	658.535	460.799	367.401	321.908	301.255	253.285	190.389	190.389	152.35	143.172
1B72	1000	7000	13	15000		271	632.201	436.443	348.914	306.869	287.754	243.555	185.278	185.278	149.672	143.172
2-batch setup
2B1	800	3000	1	5000	84000	6	295.935	190.392	159.655	147.099	141.98	130.438	116.873	116.873	109.443	104.819
2B2	800	3000	1	10000	84000	6	295.935	190.392	159.655	147.099	141.98	130.438	116.873	116.873	109.443	104.819
2B3	800	3000	1	15000	84000	6	295.935	190.392	159.655	147.099	141.98	130.438	116.873	116.873	109.443	104.819
2B4	800	3000	5	5000	20000	70	494.336	340.977	269.098	235.775	221.574	188.456	146.423	146.423	123.733	110.858
2B5	800	3000	5	10000	50000	110	460.217	320.003	257.307	227.951	215.142	185.731	149.103	149.103	127.995	114.276
2B6	800	3000	5	15000	10000	150	445.493	315.505	257.686	229.413	216.714	187.255	149.538	149.538	127.52	113.662
2B7	800	3000	9	5000	26000	134	516.633	370.528	297.805	262.388	246.608	210.06	163.466	163.466	135.587	117.791
2B8	800	5000	1	5000	80000	10	348.512	213.739	174.941	159.173	152.74	138.261	121.235	121.235	111.895	106.065
2B9	800	5000	1	10000	80000	10	348.512	213.739	174.941	159.173	152.74	138.261	121.235	121.235	111.895	106.065
2B10	800	5000	1	15000	80000	10	348.512	213.739	174.941	159.173	152.74	138.261	121.235	121.235	111.895	106.065
2B11	800	5000	5	5000	70000	90	513.111	348.419	274.093	240.226	225.76	192.816	152.636	152.636	129.862	115.368
2B12	800	5000	5	10000	30000	130	504.4	353.073	283.65	250.494	235.794	201.852	158.783	158.783	133.064	116.56
2B13	800	7000	1	5000	76000	14	386.97	233.389	187.89	169.399	161.859	144.895	124.936	124.936	113.976	107.109
2B14	800	7000	1	10000	76000	14	386.97	233.389	187.89	169.399	161.859	144.895	124.936	124.936	113.976	107.109
2B15	800	7000	1	15000	76000	14	386.97	233.389	187.89	169.399	161.859	144.895	124.936	124.936	113.976	107.109
2B16	800	7000	5	5000	50000	110	539.12	374.845	296.613	259.815	243.783	206.973	161.216	161.216	134.885	117.879
2B17	800	7000	5	10000	10000	150	530.421	374.25	300.951	265.546	249.544	212.031	163.696	163.696	135.481	117.677
2B18	1000	3000	1	5000	84000	6	351.841	216.238	176.767	160.647	154.063	139.236	121.789	121.789	112.212	106.239
2B19	1000	3000	1	10000	84000	6	351.841	216.238	176.767	160.647	154.063	139.236	121.789	121.789	112.212	106.239
2B20	1000	3000	1	15000	84000	6	351.841	216.238	176.767	160.647	154.063	139.236	121.789	121.789	112.212	106.239
2B21	1000	3000	5	5000	20000	70	606.936	409.76	317.356	274.54	256.28	213.697	159.611	159.611	130.431	113.902
2B22	1000	3000	5	10000	50000	110	563.241	383.008	302.405	264.658	248.182	210.354	163.225	163.225	136.055	118.393
2B23	1000	3000	5	15000	10000	150	544.309	377.22	302.886	266.535	250.203	212.317	163.794	163.794	135.454	117.608
2B24	1000	3000	9	5000	26000	134	635.752	447.948	354.459	308.921	288.629	241.628	181.694	181.694	145.823	122.917
2B25	1000	5000	1	5000	80000	10	419.437	246.241	196.418	176.163	167.892	149.291	127.396	127.396	115.366	107.842
2B26	1000	5000	1	10000	80000	10	419.437	246.241	196.418	176.163	167.892	149.291	127.396	127.396	115.366	107.842
2B27	1000	5000	1	15000	80000	10	419.437	246.241	196.418	176.163	167.892	149.291	127.396	127.396	115.366	107.842
2B28	1000	5000	5	5000	70000	90	631.234	419.54	323.987	280.442	261.836	219.465	167.769	167.769	138.455	119.793
2B29	1000	5000	5	10000	30000	130	620.029	425.512	336.263	293.633	274.728	231.077	175.673	175.673	142.579	121.333
2B30	1000	7000	1	5000	76000	14	468.886	271.489	213.055	189.309	179.614	157.818	132.153	132.153	118.042	109.184
2B31	1000	7000	1	10000	76000	14	468.886	271.489	213.055	189.309	179.614	157.818	132.153	132.153	118.042	109.184
2B32	1000	7000	1	15000	76000	14	468.886	271.489	213.055	189.309	179.614	157.818	132.153	132.153	118.042	109.184
2B33	1000	7000	5	5000	50000	110	664.66	453.504	352.933	305.619	285	237.661	178.799	178.799	144.914	123.024
2B34	1000	7000	5	10000	10000	150	653.473	452.73	358.499	312.98	292.402	244.165	181.995	181.995	145.689	122.77
3-batch setup
3B1	800	3000	1	5000	40500	9	338.321	224.312	185.114	168.059	160.899	144.593	124.635	124.635	113.12	106.226
3B2	800	3000	1	10000	40500	9	338.321	224.312	185.114	168.059	160.899	144.593	124.635	124.635	113.12	106.226
3B3	800	3000	1	15000	40500	9	338.321	224.312	185.114	168.059	160.899	144.593	124.635	124.635	113.12	106.226
3B4	800	3000	5	5000	27500	105	501.393	352.879	282.432	249.102	234.42	200.687	157.932	157.932	132.418	116.222
3B5	800	5000	1	5000	37500	15	394.565	253.531	205.038	183.981	175.145	155.029	130.285	130.285	116.066	107.604
3B6	800	5000	1	10000	37500	15	394.565	253.531	205.038	183.981	175.145	155.029	130.285	130.285	116.066	107.604
3B7	800	5000	1	15000	37500	15	394.565	253.531	205.038	183.981	175.145	155.029	130.285	130.285	116.066	107.604
3B8	800	5000	5	5000	12500	135	540.676	386.273	310.103	272.984	256.357	217.548	166.867	166.867	137.266	118.613
3B9	800	7000	1	5000	34500	21	433.508	277.204	221.319	197.017	186.805	163.569	134.803	134.803	118.378	108.67
3B10	800	7000	1	10000	34500	21	433.508	277.204	221.319	197.017	186.805	163.569	134.803	134.803	118.378	108.67
3B11	800	7000	1	15000	34500	21	433.508	277.204	221.319	197.017	186.805	163.569	134.803	134.803	118.378	108.67
3B12	1000	3000	1	5000	40500	9	406.356	259.832	209.469	187.557	178.352	157.406	131.723	131.723	116.891	108.015
3B13	1000	3000	1	10000	40500	9	406.356	259.832	209.469	187.557	178.352	157.406	131.723	131.723	116.891	108.015
3B14	1000	3000	1	15000	40500	9	406.356	259.832	209.469	187.557	178.352	157.406	131.723	131.723	116.891	108.015
3B15	1000	3000	5	5000	27500	105	616.163	425.263	334.698	291.843	272.961	229.579	174.579	174.579	141.748	120.9
3B16	1000	5000	1	5000	37500	15	478.665	297.384	235.074	208.018	196.659	170.818	138.979	138.979	120.67	109.781
3B17	1000	5000	1	10000	37500	15	478.665	297.384	235.074	208.018	196.659	170.818	138.979	138.979	120.67	109.781
3B18	1000	5000	1	15000	37500	15	478.665	297.384	235.074	208.018	196.659	170.818	138.979	138.979	120.67	109.781
3B19	1000	5000	5	5000	12500	135	666.655	468.184	370.264	322.54	301.158	251.255	186.07	186.07	147.983	123.974
3B20	1000	7000	1	5000	34500	21	528.735	327.804	255.992	224.775	211.64	181.79	144.776	144.776	123.633	111.146
3B21	1000	7000	1	10000	34500	21	528.735	327.804	255.992	224.775	211.64	181.79	144.776	144.776	123.633	111.146
3B22	1000	7000	1	15000	34500	21	528.735	327.804	255.992	224.775	211.64	181.79	144.776	144.776	123.633	111.146
