# Supplementary material for: Reaction progress of clay minerals and carbonaceous matter in a contact metamorphic aureole (Torres del Paine intrusion, Chile)
Source: Copernicus journal article supplement (doi:10.5194/ejm-32-653-2020), 2020-12-09
Supplement: Supplementary file 2 [file ejm-32-653-2020-supplement.zip]

## Supplement 1

“Reaction progress of clay minerals and carbonaceous matter in a contact metamorphic aureole (Torres del Paine Intrusion, Chile)”

Annette Süssenberger, Susanne Theodora Schmidt, Florian H. Schmidt, Manuel F. G. Weinkauf

*European Journal of Mineralogy*

**Table S1.** GPS coordinates of all samples used in this study. UTM 18S corresponds to the sector 18F.

| Sample ID | UTM 18S |         |
|-----------|---------|---------|
| CPA.16-9  | 6464876 | 4351220 |
| CPA.16-10 | 6461492 | 4350981 |
| CPA.16-11 | 6466696 | 4350923 |
| CPA.16-12 | 647349  | 4350213 |
| CPA.16-15 | 6448226 | 4347435 |
| CPA.16-16 | 6444707 | 4347505 |
| CPA.16-17 | 6443755 | 4347591 |
| CPA.16-18 | 6442943 | 4347774 |
| 09PR44    | 644011  | 4348432 |
| L47       | 643319  | 4346919 |
| 09TP19    | 643815  | 4352284 |
| CPA.15-10 | 626279  | 4353526 |
| CPA.15-11 | 626703  | 4354581 |
| CPA.15-12 | 626471  | 4354326 |
| CPA.15-13 | 626155  | 4353853 |
| CPA.15-15 | 626579  | 4352920 |
| 09PR23    | 643848  | 4351936 |

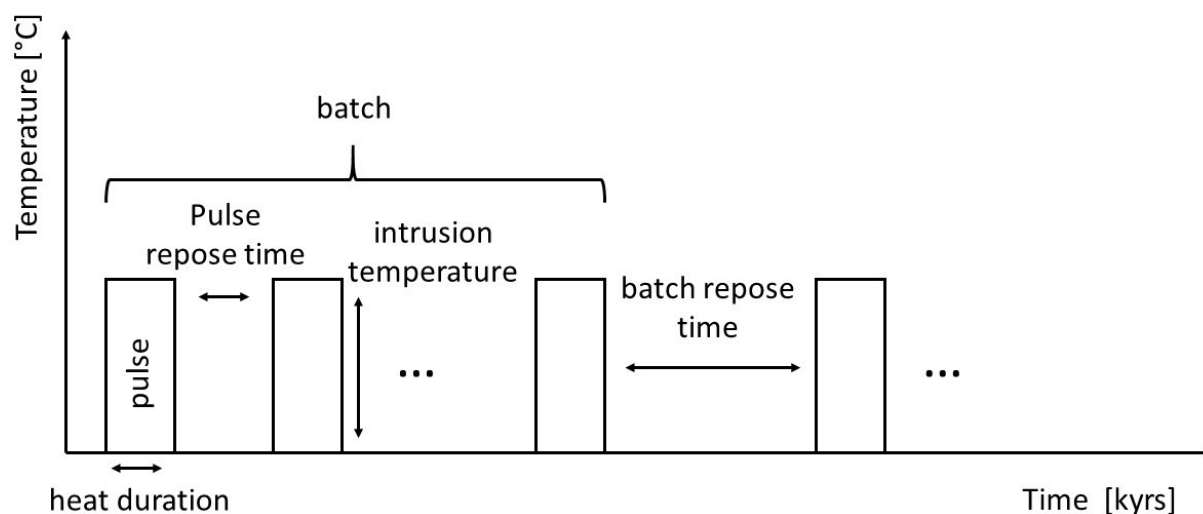

**Figure S1.** General setup of the intrusion modelling steps.

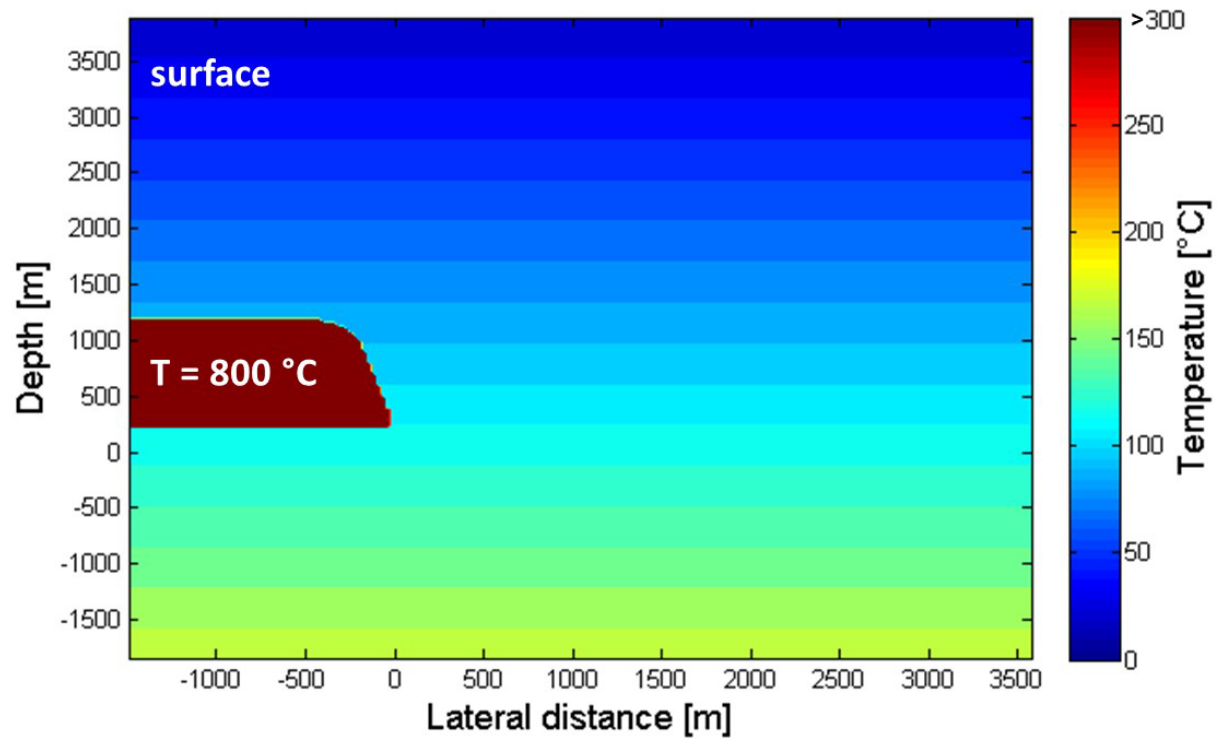

**Figure S2.** Setup of the intrusion model at time  $t = 0$ , here with an intrusion temperature of 800 °C, showing a normal geothermal gradient.

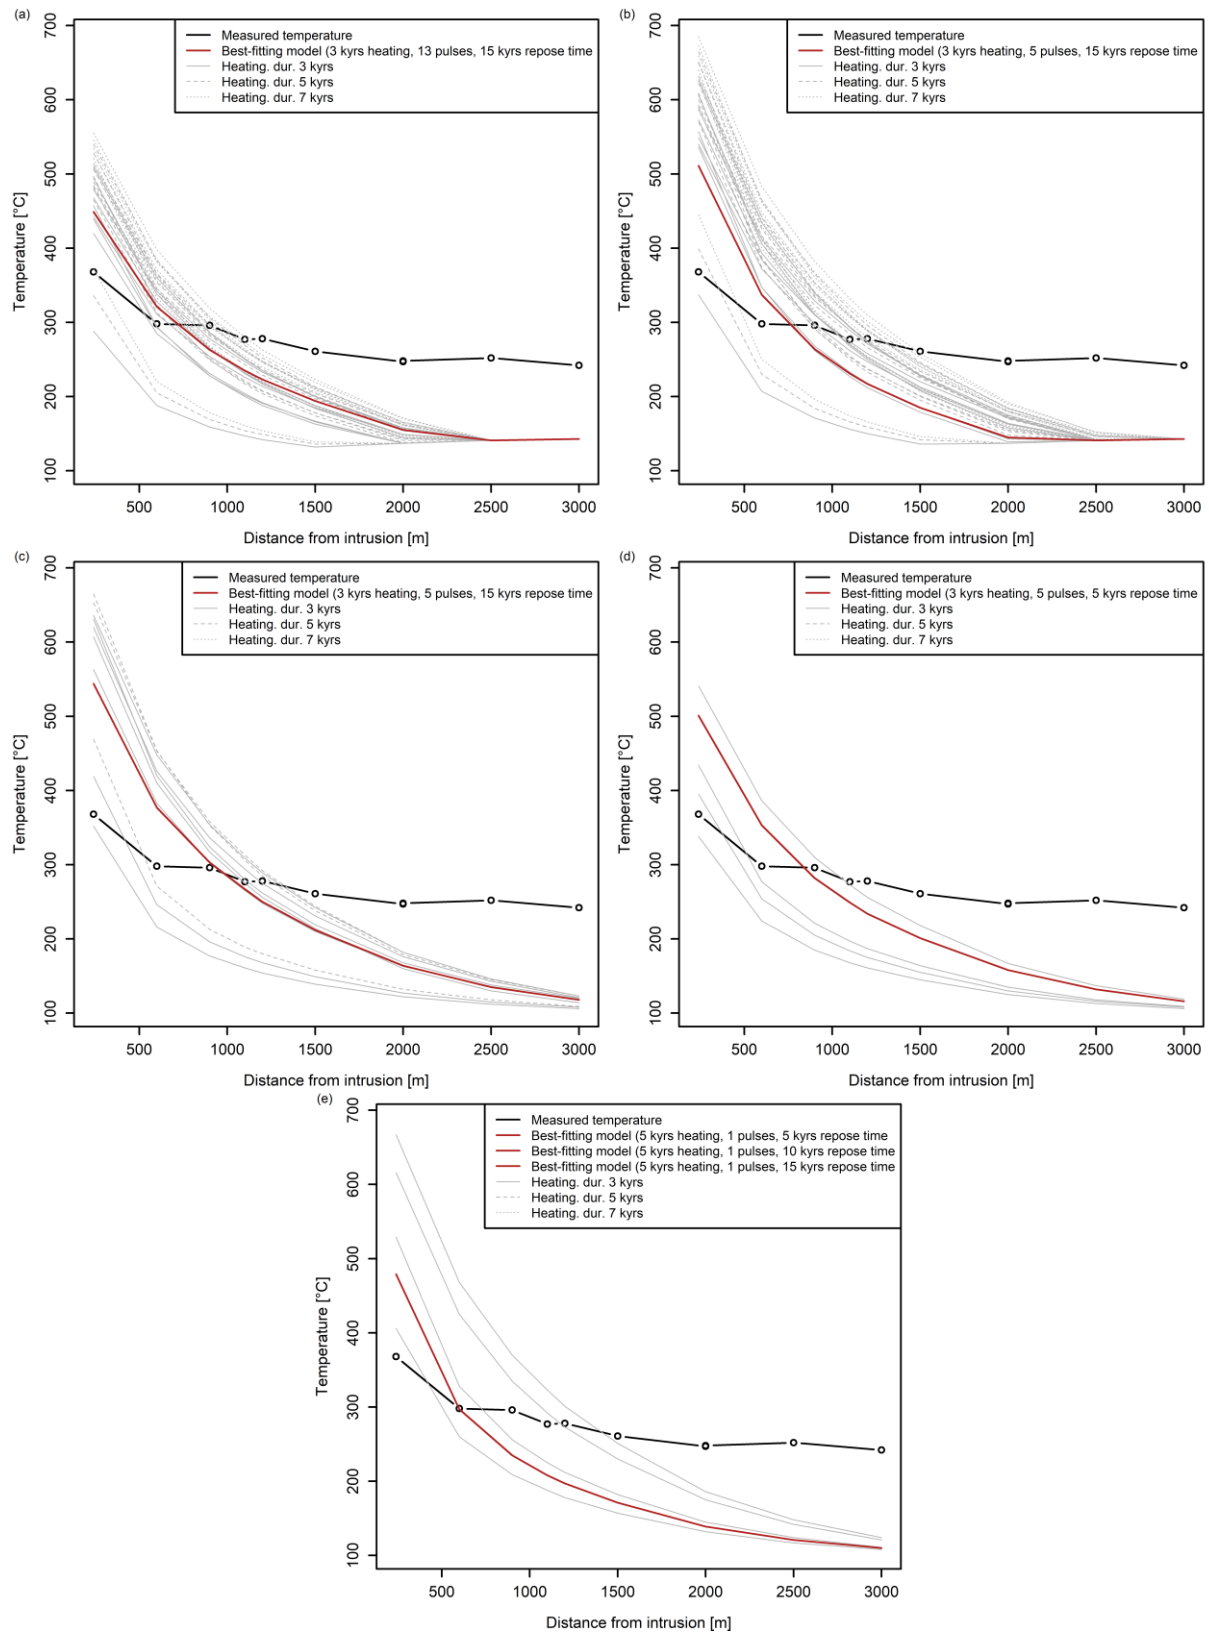

**Figure S3.** Comparison between measured Raman temperatures and modelled temperatures in the aureole of the Torres del Paine Intrusion, with the best-fitting model in each case marked in red. (a) 1-batch model at 800 °C intrusion temperature. (b) 1-batch model at 1000 °C intrusion temperature. (c) 2-batch model at 1000 °C intrusion temperature. (d) 3-batch model at 800 °C intrusion temperature. (e) 3-batch model at 1000 °C intrusion temperature.
